# Supplementary material for: The Surgical Apgar Score: A Systematic Review of Its Discriminatory Performance
Source: PubMed Central journal article supplement — Ann Surg Open. 2022 Dec 7;3(4):e227. doi: 10.1097/AS9.0000000000000227 (PMC10406005; doi:10.1097/as9.0000000000000227), 2022-12-07
Supplement: as9-3-e227-s001.pdf [file as9-3-e227-s001.pdf]

| Item Number                            | Recommendation                                                                                                                             | Reported on Page Number |
|----------------------------------------|--------------------------------------------------------------------------------------------------------------------------------------------|-------------------------|
| <b>Background should include:</b>      |                                                                                                                                            |                         |
| 1                                      | Problem definition                                                                                                                         | Page 1                  |
| 2                                      | Hypothesis statement                                                                                                                       | Page 3                  |
| 3                                      | Description of study outcome(s)                                                                                                            | Table 3, Appendix 3     |
| 4                                      | Type of exposure or intervention                                                                                                           | N/A                     |
| 5                                      | Type of study designs                                                                                                                      | Page 4                  |
| 6                                      | Study population                                                                                                                           | Table 2                 |
| <b>Search strategy should include:</b> |                                                                                                                                            |                         |
| 7                                      | Qualifications of searchers                                                                                                                | Page 12                 |
| 8                                      | Search strategy including time period in the synthesis and key words                                                                       | Appendix 2              |
| 9                                      | Effort to include all available studies including contact with authors                                                                     | Page 6                  |
| 10                                     | Databases and registries searched                                                                                                          | Appendix 2              |
| 11                                     | Search software used, name and version, including special features used                                                                    | Appendix 2              |
| 12                                     | Use of hand searching                                                                                                                      | Page 6                  |
| 13                                     | List of citations located and those excluded, including justification                                                                      | Figure 1, Page 6        |
| 14                                     | Method of addressing articles published in languages other than English                                                                    | Page 6                  |
| 15                                     | Methods of handling abstracts and unpublished studies                                                                                      | Page 6                  |
| 16                                     | Description of any contact with authors                                                                                                    | Page 6                  |
| <b>Methods should include:</b>         |                                                                                                                                            |                         |
| 17                                     | Description of relevance of appropriateness of studies assembled for addressing the hypothesis to be tested                                | Page 4/5                |
| 18                                     | Rationale for the selection and coding of data                                                                                             | Page 5                  |
| 19                                     | Documentation of how data was classified and coded                                                                                         | Page 4                  |
| 20                                     | Assessment of confounding                                                                                                                  | Page 4/5                |
| 21                                     | Assessment of study quality, including blinding of quality assessors, stratification or regression on possible predictors of study results | Page 4/5                |
| 22                                     | Assessment of heterogeneity                                                                                                                | N/A                     |
| 23                                     | Description of statistical methods                                                                                                         | Page 5                  |
| 24                                     | Provision of appropriate tables and graphics                                                                                               | Yes                     |
| <b>Results should include:</b>         |                                                                                                                                            |                         |
| 25                                     | Graphic summarizing individual study estimates and overall estimate                                                                        | Table 3                 |
| 26                                     | Table giving descriptive information for each study included                                                                               | Table 2                 |
| 27                                     | Results of sensitivity testing                                                                                                             | N/A                     |
| 28                                     | Indication of statistical uncertainty of findings                                                                                          | Table 3                 |
| <b>Discussion should include:</b>      |                                                                                                                                            |                         |
| 29                                     | Quantitative assessment of bias                                                                                                            | Page 11/12              |
| 30                                     | Justification for exclusion                                                                                                                | Page 11/12              |
| 21                                     | Assessment of quality of included studies                                                                                                  | Table 2                 |
| <b>Conclusions should include:</b>     |                                                                                                                                            |                         |
| 32                                     | Consideration of alternative explanations for observed results                                                                             | Page 12                 |
| 33                                     | Generalization of the conclusions                                                                                                          | Page 12                 |
| 34                                     | Guidelines for future research                                                                                                             | Page 12                 |
| 35                                     | Disclosure of funding source                                                                                                               | Page 12                 |
