# Supplementary material for: The Surgical Apgar Score: A Systematic Review of Its Discriminatory Performance
Source: PubMed Central journal article supplement — Ann Surg Open. 2022 Dec 7;3(4):e227. doi: 10.1097/AS9.0000000000000227 (PMC10406005; doi:10.1097/as9.0000000000000227), 2022-12-07
Supplement: as9-3-e227-s003.pdf [file as9-3-e227-s003.pdf]

## NEWCASTLE - OTTAWA QUALITY ASSESSMENT SCALE CASE CONTROL STUDIES

Note: A study can be awarded a maximum of one star for each numbered item within the Selection and Exposure categories. A maximum of two stars can be given for Comparability.

### Selection

1) Is the case definition adequate?

- a) yes, with independent validation  $\emptyset$
- b) yes, eg record linkage or based on self reports
- c) no description

2) Representativeness of the cases

- a) consecutive or obviously representative series of cases  $\emptyset$
- b) potential for selection biases or not stated

3) Selection of Controls

- a) community controls  $\emptyset$
- b) hospital controls
- c) no description

4) Definition of Controls

- a) no history of disease (endpoint)  $\emptyset$
- b) no description of source

### Comparability

1) Comparability of cases and controls on the basis of the design or analysis

- a) study controls for \_\_\_\_\_ (Select the most important factor.)  $\emptyset$
- b) study controls for any additional factor  $\emptyset$  (This criteria could be modified to indicate specific control for a second important factor.)

### Exposure

1) Ascertainment of exposure

- a) secure record (eg surgical records)  $\emptyset$
- b) structured interview where blind to case/control status  $\emptyset$
- c) interview not blinded to case/control status
- d) written self report or medical record only
- e) no description

2) Same method of ascertainment for cases and controls a) yes  $\emptyset$

b) no

3) Non-Response rate

- a) same rate for both groups  $\emptyset$
- b) non respondents described
- c) rate different and no designation

## NEWCASTLE - OTTAWA QUALITY ASSESSMENT SCALE COHORT STUDIES

Note: A study can be awarded a maximum of one star for each numbered item within the Selection and Outcome categories. A maximum of two stars can be given for Comparability

### Selection

1) Representativeness of the exposed cohort

- a) truly representative of the average \_\_\_\_\_ (describe) in the community  $\emptyset$  b) somewhat representative of the average \_\_\_\_\_ in the community  $\emptyset$
- c) selected group of users eg nurses, volunteers
- d) no description of the derivation of the cohort

2) Selection of the non exposed cohort

- a) drawn from the same community as the exposed cohort  $\emptyset$  b) drawn from a different source
- c) no description of the derivation of the non exposed cohort

3) Ascertainment of exposure

- a) secure record (eg surgical records)  $\emptyset$  b) structured interview  $\emptyset$
- c) written self report
- d) no description

4) Demonstration that outcome of interest was not present at start of study a) yes  $\emptyset$

- b) no

### Comparability

1) Comparability of cohorts on the basis of the design or analysis

- a) study controls for \_\_\_\_\_ (select the most important factor)  $\emptyset$
- b) study controls for any additional factor  $\emptyset$  (This criteria could be modified to indicate specific control for a second important factor.)

### Outcome

1) Assessment of outcome

- a) independent blind assessment  $\emptyset$  b) record linkage  $\emptyset$
- c) self report
- d) no description

2) Was follow-up long enough for outcomes to occur

- a) yes (select an adequate follow up period for outcome of interest)  $\emptyset$  b) no

3) Adequacy of follow up of cohorts

- a) complete follow up - all subjects accounted for  $\emptyset$
- b) subjects lost to follow up unlikely to introduce bias - small number lost - > \_\_\_\_\_ % (select an

adequate %) follow up, or description provided of those lost)  $\emptyset$

- c) follow up rate < \_\_\_\_\_ % (select an adequate %) and no description of those lost d) no statement
