# Supplementary material for: The Surgical Apgar Score: A Systematic Review of Its Discriminatory Performance
Source: PubMed Central journal article supplement — Ann Surg Open. 2022 Dec 7;3(4):e227. doi: 10.1097/AS9.0000000000000227 (PMC10406005; doi:10.1097/as9.0000000000000227), 2022-12-07
Supplement: as9-3-e227-s005.pdf [file as9-3-e227-s005.pdf]

| First Author | Year | Location                                                           | Study Design                                                                       | Type of Surgery                                      | N    | Outcome                                                         | Endpoint      | Risk of Bias |
|--------------|------|--------------------------------------------------------------------|------------------------------------------------------------------------------------|------------------------------------------------------|------|-----------------------------------------------------------------|---------------|--------------|
| Gawande      | 2007 | USA                                                                | Retrospective cohort for derivation, prospective cohort for testing and validation | General/Vascular                                     | 767  | Morbidity and mortality (NSQIP)                                 | 30d           | Low          |
| Regenbogen   | 2009 | USA                                                                | Retrospective cohort                                                               | General/Vascular                                     | 4119 | Morbidity and mortality (NSQIP)                                 | 30d           | Low          |
| Regenbogen   | 2010 | USA                                                                | Retrospective cohort                                                               | General                                              | 795  | Morbidity and mortality (NSQIP)                                 | 30d           | Low          |
| Wuerz        | 2011 | USA                                                                | Retrospective cohort                                                               | Orthopedic Surgery                                   | 3511 | Morbidity and mortality (NSQIP)                                 | 30d           | Low          |
| Haynes       | 2011 | Canada, India, Jordan, New Zealand, Philippines, Tanzania, UK, USA | Prospective cohort                                                                 | Non-cardiac procedures undergoing general anesthesia | 5909 | Morbidity and mortality (NSQIP)                                 | 30d           | Low          |
| Ohlsson      | 2011 | Sweden                                                             | Prospective cohort                                                                 | General/Vascular                                     | 224  | Morbidity and mortality (NSQIP)                                 | 30d           | Low          |
| Roghman      | 2012 | Germany                                                            | Combined retrospective and cohort                                                  | Urologic                                             | 44   | Mortality                                                       | 30d           | Low          |
| Thorn        | 2012 | UK                                                                 | Prospective cohort                                                                 | General/Vascular/Orthopedic                          | 223  | Morbidity and mortality (NSQIP)                                 | 30d           | Low          |
| Urrutia      | 2012 | Chile                                                              | Prospective cohort                                                                 | Orthopedic                                           | 723  | Morbidity and mortality (NSQIP)                                 | 30d           | Low          |
| Dullo        | 2013 | Kenya                                                              | Prospective cohort                                                                 | General – emergent laparotomy                        | 152  | Morbidity and mortality using definition from POSSUM validation | 30d           | Low          |
| Sobol        | 2013 | USA                                                                | Retrospective cohort                                                               | General – major intra-abdominal                      | 8501 | Post-op ICU admission                                           |               | Low          |
| Miki         | 2014 | Japan                                                              | Retrospective cohort                                                               | General - gastrectomy                                | 328  | Morbidity and mortality (CDC)                                   | 30d           | Low          |
| Glass        | 2015 | USA                                                                | Retrospective cohort                                                               | General other than trauma or endoscopy               | 2125 | Post-op ICU admission                                           |               | Low          |
| Jering       | 2015 | USA                                                                | Retrospective cohort                                                               | General/Vascular/Oncological                         | 4728 | Morbidity and mortality (NSQIP)                                 | 30d           | Low          |
| Sakan        | 2015 | Croatia                                                            | Retrospective cohort                                                               | Orthopedic                                           | 43   | Morbidity and mortality (NSQIP)                                 | 30d and 6mo   | Low          |
| Urrutia      | 2015 | Chile                                                              | Prospective cohort                                                                 | Orthopedic spine                                     | 268  | Morbidity and mortality (NSQIP)                                 | 30d           | Low          |
| Eto          | 2016 | Japan                                                              | Retrospective cohort                                                               | Thoracic - esophagectomy                             | 399  | Morbidity and mortality (CDC)                                   | Not specified | Low          |
| Wied         | 2016 | Denmark                                                            | Retrospective cohort                                                               | Orthopedic – lower limb amputation                   | 170  | Morbidity and mortality (NSQIP)                                 | 30d           | Low          |

|                                                                                        |      |          |                           |                                                                                                  |       |                                                    |                              |     |
|----------------------------------------------------------------------------------------|------|----------|---------------------------|--------------------------------------------------------------------------------------------------|-------|----------------------------------------------------|------------------------------|-----|
| <b>Ejaz</b>                                                                            | 2016 | USA      | Retrospective cohort      | General – major gastrointestinal                                                                 | 1833  | Morbidity and mortality (NSQIP)                    | 30d                          | Low |
| <b>House</b>                                                                           | 2016 | USA      | Retrospective cohort      | Non-cardiac/non-thoracic                                                                         | 46799 | Peak troponin, length of stay, 7 and 30d mortality | 30d                          | Low |
| <b>Choric</b>                                                                          | 2016 | Denmark  | Prospective cohort        | General - emergent                                                                               | 355   | Morbidity and mortality (NSQIP and CDC)            | 30d                          | Low |
| <b>Stroyer</b>                                                                         | 2017 | Denmark  | Retrospective cohort      | Thoracic – Ivor-Lewis esophagectomy                                                              | 234   | Morbidity and mortality (CDC)                      | 30d                          | Low |
| <b>Ngarambe</b>                                                                        | 2017 | Rwanda   | Prospective cohort        | General – exploratory laparotomy                                                                 | 218   | Morbidity and mortality (NSQIP)                    | In-hospital                  | Low |
| <b>Ou</b>                                                                              | 2017 | Taiwan   | Retrospective cohort      | Neuro/Orthopedic spine fusion                                                                    | 199   | In-hospital major complication (NSQIP)             | In-hospital                  | Low |
| <b>Hsu</b>                                                                             | 2017 | Taiwan   | Retrospective cohort      | Neuro – craniotomy for meningioma                                                                | 99    | Morbidity and mortality (NSQIP)                    | 30d                          | Low |
| <b>Kurata</b>                                                                          | 2017 | Japan    | Retrospective cohort      | Gyne/Onc                                                                                         | 70    | Morbidity and mortality (CDC)                      | 30d                          | Low |
| <b>Mastalerz</b>                                                                       | 2018 | Poland   | Prospective cohort        | General                                                                                          | 144   | Morbidity and mortality (CDC)                      | 30d                          | Low |
| <b>Day</b>                                                                             | 2018 | USA      | Case series/chart review  | Head and neck cancer surgery                                                                     | 713   | Morbidity and mortality (NSQIP)                    | 30d                          | Low |
| <b>Kotera</b>                                                                          | 2018 | Japan    | Retrospective cohort      | Orthopedic                                                                                       | 506   | Morbidity and mortality (NSQIP)                    | 30d morbidity, 90d mortality | Low |
| <b>Goel</b>                                                                            | 2018 | USA      | Prospective cohort        | Cancer surgery                                                                                   | 405   | Morbidity and mortality (NSQIP)                    | 30d                          | Low |
| <b>Kenig(2)</b>                                                                        | 2018 | Poland   | Prospective cohort        | General – emergency in elderly population                                                        | 315   | Morbidity and mortality (CDC)                      | 30d                          | Low |
| <b>Kenig(1)</b>                                                                        | 2018 | Poland   | Prospective cohort        | General/Oncological surgery in elderly patients                                                  | 165   | Morbidity and mortality (CDC)                      | 30d                          | Low |
| <b>Yoshito</b>                                                                         | 2018 | Japan    | Retrospective cohort      | Hepatobiliary – curative resection for hepatocellular carcinoma                                  | 158   | Morbidity and mortality (CDC)                      | 30d                          | Low |
| <b>Prince</b>                                                                          | 2018 | USA      | Retrospective case series | Head and Neck – resection of squamous cell carcinoma                                             | 563   | Morbidity and mortality (NSQIP)                    | 30d                          | Low |
| <b>Ding</b>                                                                            | 2019 | China    | Prospective cohort        | Hepatobiliary – pancreaticoduodenectomy or distal pancreatectomy for pancreatic ductal carcinoma | 160   | Morbidity and mortality (NSQIP)                    | 30d                          | Low |
| <b>Singh</b>                                                                           | 2019 | Trinidad | Retrospective cohort      | General - emergency                                                                              | 220   | Morbidity and mortality (NSQIP and CDC)            | Not specified                | Low |
| CDC: Clavien-Dindo classification, NSQIP: National Surgery Quality Improvement Program |      |          |                           |                                                                                                  |       |                                                    |                              |     |
