# Supplementary material for: The Surgical Apgar Score: A Systematic Review of Its Discriminatory Performance
Source: PubMed Central journal article supplement — Ann Surg Open. 2022 Dec 7;3(4):e227. doi: 10.1097/AS9.0000000000000227 (PMC10406005; doi:10.1097/as9.0000000000000227), 2022-12-07
Supplement: as9-3-e227-s006.pdf [file as9-3-e227-s006.pdf]

| Author (Year)                     | Population                                                                                 | Outcome                               | End-point      | Morbidity %                                                         | AUROC / c-statistic Morbidity (95% CI)                                                                              | Mortality % | AUROC / c-statistic Mortality (95%CI)          |
|-----------------------------------|--------------------------------------------------------------------------------------------|---------------------------------------|----------------|---------------------------------------------------------------------|---------------------------------------------------------------------------------------------------------------------|-------------|------------------------------------------------|
| <b>General / Vascular Surgery</b> |                                                                                            |                                       |                |                                                                     |                                                                                                                     |             |                                                |
| <b>Gawande (2007)</b>             | Mean age 55.3, undergoing any general or vascular surgery                                  | Morbidity & mortality                 | 30d            | 9.1 (major), 4.6 (minor)                                            | 0.72                                                                                                                | 1.4         | 0.92 (univariate logistic regression)          |
| <b>Regenbogen (2009)</b>          | Mean age of 58, undergoing general or vascular surgery                                     | Morbidity & mortality                 | 30d            | 14.1                                                                | 0.73                                                                                                                | 2.3         | 0.81                                           |
| <b>Regenbogen (2010)</b>          | Mean age 63, undergoing colon or rectal resection                                          | Morbidity                             | 30d            | 28.9                                                                | 0.68 (for predicting post-discharge comp.)                                                                          |             |                                                |
| <b>Ohlsson (2011)</b>             | Mean age 60.5, undergoing general or vascular surgery                                      | Morbidity or mortality                | 30d            | 17.9                                                                | 0.69                                                                                                                | 1.8         |                                                |
| <b>Dullo (2013)</b>               | Mean age 35.2 undergoing emergent laparotomy                                               | Morbidity or mortality                | 30d            | 40.8                                                                | 0.796 (0.727-0.865)                                                                                                 | 7.9         |                                                |
| <b>Sobol (2013)</b>               | Mean age 59 undergoing intraabdominal surgery                                              | Post-op ICU admission                 | Direct post-op | 8.7 transferred to ICU immediately post-op, 4.6 had later admission | 0.7632 (0.75-0.78)<br>0.69 (0.66-0.72) for later ICU admission from PACU or ward                                    |             |                                                |
| <b>Miki (2014)</b>                | Mean age 66.8 undergoing gastrectomy for primary gastric cancer                            | Morbidity                             | 30d            | CDc IIIa or greater: 11.0                                           | 0.65                                                                                                                |             |                                                |
| <b>Glass (2015)</b>               | Mean age 64 undergoing any general surgery procedure                                       | Post-op ICU admission, length of stay | 30d            | 28.6 admitted to ICU                                                | 0.74 for ICU admission                                                                                              |             |                                                |
| <b>Jering (2015)</b>              | Mean age 55 undergoing general, vascular, or oncological surgery                           | Morbidity or mortality                | 30d            | 16.11                                                               | General: 0.71 (0.69-0.72)<br>Vascular: 0.72 (0.70-0.74)<br>Oncology: 0.70 (0.65-0.74)<br>Combined: 0.74 (0.74-0.75) | 1.5         |                                                |
| <b>Ejaz (2016)</b>                | Mean age 57 undergoing major gastrointestinal surgery (hepatic, pancreatic, or colorectal) | Morbidity & mortality                 | 30d            | 17.1                                                                | 0.6446                                                                                                              | 0.9         |                                                |
| <b>Cihoric (2016)</b>             | Median age 70 undergoing emergency abdominal surgery                                       | Morbidity or mortality                | 30d            | 32.7                                                                | 0.63                                                                                                                | 16.3        |                                                |
| <b>Ngarambe (2017)</b>            | Mean age 34 undergoing exploratory laparotomy                                              | Morbidity & mortality                 | In-hospital    | 28.6                                                                | 0.7924                                                                                                              | 18.3        | 0.7515                                         |
| <b>Mastalerz (2018)</b>           | Median age 76 undergoing elective laparoscopic cholecystectomy                             | Morbidity                             | 30d            | 11.8                                                                | 0.71                                                                                                                | 0           |                                                |
| <b>Kenig (2018/2)</b>             | Mean age 77 undergoing emergency abdominal surgery                                         | Morbidity & mortality                 | 30d            | 56.8 (all)<br>35.9 (major)                                          | SAS < 7 0.70 (0.62-0.79)                                                                                            | 25.1        | SAS < 7 0.74 (0.66-0.83)                       |
| <b>Kenig (2018/1)</b>             | Mean age 77 undergoing general oncological surgeries                                       | Morbidity & mortality                 | 30d            | 49.7 (all),<br>32.7 (major)                                         | SAS < 7: 0.72 (0.6-0.79)                                                                                            | 9.0         | SAS < 7: 0.76 (0.6-0.8)                        |
| <b>Singh (2019)</b>               | Median age 62 undergoing emergency abdominal surgery                                       | Morbidity or mortality                | Post-operative | 33 (major or death)                                                 | 0.71 (0.68-0.73)                                                                                                    | 11          |                                                |
| <b>Orthopedic / Spine Surgery</b> |                                                                                            |                                       |                |                                                                     |                                                                                                                     |             |                                                |
| <b>Wuerz (2011)</b>               | Mean age 66, undergoing hip or knee arthroplasty                                           | Morbidity or mortality                | 30d            | 5.6                                                                 | 0.61 (0.60 without mortality)                                                                                       |             |                                                |
| <b>Urrutia (2012)</b>             | Adult patients undergoing orthopedic surgeries, mean age NR                                | Morbidity or mortality                | 30d            | 5.12                                                                | 0.59 (0.48-0.69)                                                                                                    | 0.69        |                                                |
| <b>Sakan (2015)</b>               | Mean age 80.3 undergoing orthopedic surgery for traumatic hip fracture                     | Morbidity & mortality                 | 30d, 6mo       | 18.6 (30d)                                                          | SAS ≤ 4: 0.743 (0.587-0.864) for 30d morbidity                                                                      | 11.6 (30d)  | SAS ≤ 4: 0.629 (0.468-0.771) for 30d mortality |
| <b>Urrutia (2015)</b>             | Adult patients undergoing orthopedic spine surgeries, mean age NR                          | Morbidity or mortality                | 30d            | 6.72                                                                | 0.77 (0.66-0.88)                                                                                                    | 0.75        |                                                |
| <b>Wied (2016)</b>                | Mean age 74 undergoing lower extremity amputation                                          | Morbidity & mortality                 | 30d            |                                                                     | All patients = 0.648 (0.562-0.733),<br>TFA=0.710 (0.606-0.813) and TTA=0.472 (0.383-0.672)                          | 18          |                                                |

|                                                                                                                                            |                                                                                    |                                                              |                              |                                         |                                                                                                                                                                               |                                       |                     |
|--------------------------------------------------------------------------------------------------------------------------------------------|------------------------------------------------------------------------------------|--------------------------------------------------------------|------------------------------|-----------------------------------------|-------------------------------------------------------------------------------------------------------------------------------------------------------------------------------|---------------------------------------|---------------------|
| <b>Ou (2017)</b>                                                                                                                           | Mean age 61.8 undergoing lumbar fusion                                             | Morbidity                                                    | In-hospital                  | 8.0                                     | 0.872                                                                                                                                                                         |                                       |                     |
| <b>Kotera (2018)</b>                                                                                                                       | Mean age 87 undergoing femoral neck surgery for fracture                           | Morbidity & mortality                                        | 30d morbidity, 90d mortality | 21.7 (30d)                              |                                                                                                                                                                               | 3.4 (90d)                             | 0.76                |
| <b>Thoracic Surgery</b>                                                                                                                    |                                                                                    |                                                              |                              |                                         |                                                                                                                                                                               |                                       |                     |
| <b>Eto (2016)</b>                                                                                                                          | Mean age 65.7 undergoing esophagectomy for esophageal cancer                       | Morbidity or mortality                                       | NR                           | 32.3                                    | 0.68                                                                                                                                                                          | 0.25                                  |                     |
| <b>Stroyer (2017)</b>                                                                                                                      | Mean age 65 undergoing Ivor-Lewis esophagectomy                                    | Morbidity or mortality                                       | 30d                          | 27.4                                    | 0.561 (0.478–0.645)                                                                                                                                                           | 1.7                                   |                     |
| <b>Hepatobiliary Surgery</b>                                                                                                               |                                                                                    |                                                              |                              |                                         |                                                                                                                                                                               |                                       |                     |
| <b>Tomimaru (2018)</b>                                                                                                                     | Mean age 70 undergoing hepatectomy for hepatocellular carcinoma.                   | Morbidity                                                    | 30d                          | 17.7 Cdc II or higher                   | 0.702 for SAS ≤ 6 and ≥ 7 for predicting 30d complications                                                                                                                    |                                       |                     |
| <b>Ding (2019)</b>                                                                                                                         | Mean age 61.2 undergoing pancreaticoduodenectomy or distal pancreatectomy          | Morbidity or mortality                                       | 30d                          | 50                                      | 0.606 (0.519-0.694)                                                                                                                                                           | 3.125                                 |                     |
| <b>Urological Surgery</b>                                                                                                                  |                                                                                    |                                                              |                              |                                         |                                                                                                                                                                               |                                       |                     |
| <b>Roghmann (2012)</b>                                                                                                                     | Mean age 59, undergoing surgery for Fournier's gangrene                            | Mortality                                                    | 30d                          |                                         |                                                                                                                                                                               | 29.5                                  | 0.749 (0.571-0.881) |
| <b>Neurologic Surgery</b>                                                                                                                  |                                                                                    |                                                              |                              |                                         |                                                                                                                                                                               |                                       |                     |
| <b>Hsu (2017)</b>                                                                                                                          | Mean age 60.9 undergoing craniotomy for meningioma resection                       | Morbidity                                                    | 30d                          | 34.3                                    | 0.768                                                                                                                                                                         | 0                                     |                     |
| <b>Gynecologic Surgery</b>                                                                                                                 |                                                                                    |                                                              |                              |                                         |                                                                                                                                                                               |                                       |                     |
| <b>Kurata (2017)</b>                                                                                                                       | Mean age 73.7 undergoing non-laparoscopic gynecological surgery                    | Morbidity & mortality                                        | 30d                          | 8.8                                     | 0.80 (0.66-0.942)                                                                                                                                                             |                                       |                     |
| <b>Head and Neck Surgery</b>                                                                                                               |                                                                                    |                                                              |                              |                                         |                                                                                                                                                                               |                                       |                     |
| <b>Day (2018)</b>                                                                                                                          | Mean age 59.7 undergoing head and neck cancer surgery                              | Morbidity                                                    | 30d                          | 10.1 minor, 22.7 major                  | 0.73 (0.69-0.77)                                                                                                                                                              |                                       |                     |
| <b>Prince (2018)</b>                                                                                                                       | Mean age 60.9 undergoing non-cutaneous head/neck squamous cell carcinoma resection | Morbidity                                                    | 30d                          | 37.1                                    | 0.70 (0.66-0.74)                                                                                                                                                              |                                       |                     |
| <b>Mixed Disciplines</b>                                                                                                                   |                                                                                    |                                                              |                              |                                         |                                                                                                                                                                               |                                       |                     |
| <b>Haynes (2011)</b>                                                                                                                       | Mean age 48.9, undergoing non-cardiac surgeries in 8 countries                     | Morbidity & mortality                                        | 30d                          | 9.2                                     | 0.70                                                                                                                                                                          | 1.4                                   | 0.77                |
| <b>Thorn (2012)</b>                                                                                                                        | Adult patients undergoing general, vascular, or orthopedic surgeries, mean age NR  | Morbidity or mortality                                       | 30d                          | General / vascular: 23.6<br>Ortho: 19.5 | General / vascular: 0.73,<br>Ortho: 0.62                                                                                                                                      | General / vascular: 3.1<br>Ortho: 8.0 |                     |
| <b>House (2016)</b>                                                                                                                        | Median age 60 undergoing non-cardiac non-thoracic surgery                          | Mortality, peak troponin levels, MI, length of hospital stay | 30d                          | MI: 0.4<br>Troponin leak: 0.4           | Multivariate analysis for SAS predicting troponin leak or MI yielded a C statistic = 0.80, 0.81, and 0.80 for reference, cTn Leak, and perioperative MI groups, respectively) | 1.39 (30d)                            |                     |
| <b>Goel (2018)</b>                                                                                                                         | Mean age 61.9 undergoing major cancer surgery                                      | Morbidity                                                    | 30d                          | 11.4                                    | 0.661 (0.582-0.740)                                                                                                                                                           |                                       |                     |
| Abbreviations: d=days, Cdc=Clavien-Dindo classification, ICU=intensive care unit, PACU=post-anesthesia care unit, SAS=surgical apgar score |                                                                                    |                                                              |                              |                                         |                                                                                                                                                                               |                                       |                     |
